# Supplementary material for: Screening for Cognitive Impairment in Parkinson's Disease: Improving the Diagnostic Utility of the MoCA through Subtest Weighting
Source: PubMed Central journal article supplement (PMC4954721; doi:10.1371/journal.pone.0159318), 2016-07-20
Supplement: pone.0159318.s002.pdf [file pone.0159318.s002.pdf]

**S1 Table. Z-Scores of neuropsychological test battery for all cognitive groups in study 1.**

|                                     |              | PD-N<br>(n= 15)    | PD-MCI<br>(n= 14)     | PD-D<br>(n= 11)       | <i>p</i> -value    | Effect<br>size <i>r</i> | PD-cognitively impaired<br>(PD-MCI&PD-D; n=25) | <i>p</i> -value<br>(PD-N vs. PD-<br>cognitively impaired) | Effect<br>size <i>r</i> |
|-------------------------------------|--------------|--------------------|-----------------------|-----------------------|--------------------|-------------------------|------------------------------------------------|-----------------------------------------------------------|-------------------------|
| Verbal comprehension <sup>a,b</sup> | Mean (SD)    | 18.0 (0.0)         | 17.8 (0.8)            | 17.14 (1.464)         |                    |                         | 17.57 (1.08)                                   |                                                           |                         |
|                                     | Median (IQR) | 18.0 (18-18)       | 18.0 (18.0-18.0)      | 18.0 (15.0-18.0)      | .082               | .38                     | 18.0 (18.0-18.0)                               | .485                                                      | .25                     |
| Immediate Recall <sup>c</sup>       | Mean (SD)    | 0.06 (0.62)        | -1.42 (1.28)          | -1.9 (1.02)           | <.001 <sup>e</sup> | .64                     | -1.62 (1.18)                                   | <.001                                                     | .63                     |
|                                     | Median (IQR) | 0.02 (-0.44-0.31)  | -1.62 (-2.1-(-0.42))  | -1.85 (-2.69-(-1.16)) |                    |                         | -1.62 (-2.49-(-0.86))                          |                                                           |                         |
| Delayed Recall <sup>c</sup>         | Mean (SD)    | -0.17 (0.67)       | -0.99 (1.29)          | -1.69 (1.06)          | .006 <sup>f</sup>  | .51                     | -1.25 (1.24)                                   | .004                                                      | .46                     |
|                                     | Median (IQR) | -0.09 (-0.6-0.29)  | -1.31 (-1.71-0.27)    | -1.88 (-2.42-(-1.04)) |                    |                         | -1.54 (-2.1-(-0.1))                            |                                                           |                         |
| Semantic fluency <sup>c</sup>       | Mean (SD)    | -0.21 (1.1)        | -0.77 (1.19)          | -1.78 (1.0)           | .004 <sup>f</sup>  | .51                     | -1.21 (1.2)                                    | .011                                                      | .40                     |
|                                     | Median (IQR) | -0.34 (-0.77-0.21) | -0.50 (-1.7-0.18)     | -1.55 (-2.1-(-1.25))  |                    |                         | -1.27 (-2.05-(-0.28))                          |                                                           |                         |
| Trail Making Test B/A <sup>c</sup>  | Mean (SD)    | 0.07 (0.86)        | -0.62 (0.78)          | -0.67 (0.76)          | .057               | .40                     | -0.64 (0.76)                                   | .016                                                      | .41                     |
|                                     | Median (IQR) | 0.02 (-0.74-0.62)  | -0.83 (-1.07-(-0.23)) | -0.86 (-1.51-0.22)    |                    |                         | -0.83 (-1.09-(-0.17))                          |                                                           |                         |
| Constructional praxis <sup>b</sup>  | Mean (SD)    | 0.2 (1.2)          | -1.32 (1.54)          | -1.43 (2.08)          |                    |                         | -1.37 (1.75 )                                  |                                                           |                         |
|                                     | Median (IQR) | 0.6 (0.24-0.89)    | -1.54 (-2.85-0.44)    | -1.56 (-3.37-0.61)    | .027               | .44                     | -1.57 (-2.86-0.47)                             | .006                                                      | .43                     |
| Boston Naming Test <sup>b</sup>     | Mean (SD)    | 0.62 (0.51)        | 0.01 (0.89)           | -1.01 (1.0)           |                    |                         | -0.41 (1.05)                                   |                                                           |                         |
|                                     | Median (IQR) | 0.63 (0.41-0.87)   | 0.15 (-0.81-0.85)     | -0.9 (-1.36-(-0.52))  | .001 <sup>g</sup>  | .63                     | -0.73 (-0.93-0.78)                             | .004                                                      | .45                     |
| Digit span backwards <sup>b,d</sup> | Mean (SD)    | 41.53 (29.93)      | 37.9 (29.7)           | 40.0 (26.83)          |                    |                         | 38.79 (27.92)                                  |                                                           |                         |
|                                     | Median (IQR) | 27 (13-53)         | 32.5 (11.75-59.25)    | 40 (13-67)            | .918               | .07                     | 32.5 (13.0-63.5)                               | .809                                                      | .04                     |
| Block span forwards <sup>b,d</sup>  | Mean (SD)    | 54.33 (37.78)      | 30.1 (26.7)           | -15.1 (30.4)          |                    |                         | 24.68 (28.19)                                  |                                                           |                         |
|                                     | Median (IQR) | 57.0 (8-95)        | 28.0 (6.5-58)         | 4.5 (2-8)             | .013               | .49                     | 7.5 (2.0-57.25)                                | .008                                                      | .43                     |
| Mental rotation <sup>c,d</sup>      | Mean (SD)    | 70.8 (19.22)       | 57.23 (19.3)          | 50.0 (36.6)           | .127               | .35                     | 54.93 (25.15)                                  | .052                                                      | .34                     |
|                                     | Median (IQR) | 72.0 (55-86)       | 60.0 (41.5-71)        | 59.5 (6.93-76.75)     |                    |                         | 60.0 (40.0-70.0)                               |                                                           |                         |

SD, Standard deviation; IQR, Interquartile range

<sup>a</sup> Raw values are shown.

<sup>b</sup> The Kruskal-Wallis test with Bonferroni adjusted alpha-levels of 0.005 per test was used for variables that were not normally distributed. P-values are shown for the median. Groups were compared using the Mann-Whitney U test with Bonferroni adjusted alpha-levels of 0.0017 per test. Means and standard deviations are also reported for comparison purposes. The effect size *r* was obtained by computing partial eta-squared on the ranked scores and taking the square root.

<sup>c</sup> A univariate Between-Subjects ANOVA with Bonferroni adjusted alpha-levels of 0.005 were used for variables that were normally distributed. P-values are shown for the mean. Post-hoc comparisons were conducted using Bonferroni corrections. Median and interquartile range are also reported for comparison purposes.

<sup>d</sup> Percentile ranks are shown.

<sup>e</sup> Pairwise comparisons showed that PD-N>PD-MCI; PD-MCI=PD-D; PD-N>PD-D.

<sup>f</sup> Pairwise comparisons showed that PD-N=PD-MCI=PD-D; PD-N>PD-D.

<sup>g</sup> Pairwise comparisons showed PD-N=PD-MCI; PD-MCI>PD-D; PD-N>PD-D.
