# Supplementary material for: Screening for Cognitive Impairment in Parkinson's Disease: Improving the Diagnostic Utility of the MoCA through Subtest Weighting
Source: PubMed Central journal article supplement (PMC4954721; doi:10.1371/journal.pone.0159318), 2016-07-20
Supplement: pone.0159318.s003.pdf [file pone.0159318.s003.pdf]

**S2 Table. Z-Scores of neuropsychological test battery for all cognitive groups in study 2.**

|                                     |              | PD-N<br>(n= 8)     | PD-MCI<br>(n= 10)     | PD-D<br>(n= 6)        | <i>p</i> -value    | Effect size <i>r</i> | PD-cognitively impaired<br>(PD-MCI&PD-D; n=16) | <i>p</i> -value (PD-N vs.<br>PD-cognitively<br>impaired) | Effect<br>size <i>r</i> |
|-------------------------------------|--------------|--------------------|-----------------------|-----------------------|--------------------|----------------------|------------------------------------------------|----------------------------------------------------------|-------------------------|
| Verbal comprehension <sup>a,b</sup> | Mean (SD)    | 17.9 (0.4)         | 18.0 (0.0)            | 17 (1.6)              |                    |                      | 17.7 (1.0)                                     |                                                          |                         |
|                                     | Median (IQR) | 18 (18.0-18.0)     | 18.0 (18.0-18.0)      | 18.0 (15.0-18.0)      | .138               | .41                  | 18.0 (18.0-18.0)                               | .976                                                     | .02                     |
| Immediate Recall <sup>c</sup>       | Mean (SD)    | 0.07 (0.98)        | -1.28 (1.15)          | -3.24 (1.14)          | <.001 <sup>e</sup> | .77                  | -2.02 (1.47)                                   | .002                                                     | .61                     |
|                                     | Median (IQR) | 0.26 (-1.03-1.04)  | -1.7 (-2.0-(-0.4))    | -3.44 (-3.91-(-2.18)) |                    |                      | -1.95 (-3.18- (-1.25))                         |                                                          |                         |
| Delayed Recall <sup>c</sup>         | Mean (SD)    | -0.43 (0.9)        | -1.47 (0.59)          | -3.17 (0.89)          | <.001 <sup>e</sup> | .82                  | -2.11 (1.09)                                   | <.001                                                    | .62                     |
|                                     | Median (IQR) | -0.35 (-0.76-0.39) | -1.52 (-1.78-(-1.25)) | -3.21 (-4.0-(-2.46))  |                    |                      | -1.78 (-2.68-(-1.51))                          |                                                          |                         |
| Semantic fluency <sup>b</sup>       | Mean (SD)    | 0.65 (0.63)        | -1.04 (1.15)          | -1.71 (0.72)          |                    |                      | -1.29 (1.04)                                   |                                                          |                         |
|                                     | Median (IQR) | 0.74 (0.13-1.02)   | -1.7 (-1.93-0.06)     | -1.92 (-2.2-(-1.33))  | .002 <sup>f</sup>  | .73                  | -1.7 (-2.12-(-0.35))                           | <.001                                                    | .68                     |
| Trail Making Test B/A <sup>c</sup>  | Mean (SD)    | 0.04 (0.86)        | -0.34 (1.06)          | 0.69 (0.93)           | .147               | .41                  | .045 (1.12)                                    | .651                                                     | .20                     |
|                                     | Median (IQR) | 0.13 (-0.78-0.78)  | -0.72 (-1.1-0.35)     | 1.05 (-0.19-1.36)     |                    |                      | -0.12 (-0.96-1.24)                             |                                                          |                         |
| Constructional praxis <sup>b</sup>  | Mean (SD)    | 0.32 (0.65)        | -0.34 (1.43)          | -1.54 (1.88)          |                    |                      | -0.79 (1.66)                                   |                                                          |                         |
|                                     | Median (IQR) | 0.51 (-0.13-0.72)  | 0.52 (-1.68-0.7)      | -1.2 (-3.19-0.52)     | .165               | .40                  | -0.43 (-2.59-0.66)                             | .214                                                     | .26                     |
| Boston Naming Test <sup>b</sup>     | Mean (SD)    | 0.72 (0.66)        | -0.01 (0.97)          | -1.23 (1.67)          |                    |                      |                                                |                                                          |                         |
|                                     | Median (IQR) | 0.91 (0.41-1.25)   | 0.18 (-0.92-0.73)     | -1.53 (-2.69-0.38)    | .035               | .54                  | -0.36 (-1.43-0.69)                             | .023                                                     | .46                     |
| Digit span backwards <sup>b,d</sup> | Mean (SD)    | 45.38 (25.65)      | 41.6 (33.66)          | 18.2 (19.72)          |                    |                      | 33.8 (31.14)                                   |                                                          |                         |
|                                     | Median (IQR) | 45.5 (19.25-63.5)  | 43.5 (11.0-71.5)      | 12.0 (6.5-33.0)       | .158               | .41                  | 13.0 (8.0-53.0)                                | .238                                                     | .25                     |
| Block span forwards <sup>b,d</sup>  | Mean (SD)    | 52.13 (22.92)      | 29.8 (23.97)          | 27.83 (24.9)          |                    |                      | 29.06 (23.5)                                   |                                                          |                         |
|                                     | Median (IQR) | 57.0 (27.25-73.0)  | 28.0 (6.0-52.0)       | 20.5 (6.5-58.0)       | .237               | .35                  | 28.0 (8.0-56.0)                                | .093                                                     | .35                     |
| Mental rotation <sup>c,d</sup>      | Mean (SD)    | 49.13 (27.79)      | 37.67 (19.1)          | 22.6 (18.66)          | .147               | .43                  | 32.29 (19.7)                                   | .112                                                     | .35                     |
|                                     | Median (IQR) | 62.5 (17.0-73.5)   | 37.0 (23.0-52.5)      | 11.0 (9.0-42.0)       |                    |                      | 32.0 (11.0-50.0)                               |                                                          |                         |

SD, Standard deviation; IQR, Interquartile range

<sup>a</sup>Raw values are shown.

<sup>b</sup> The Kruskal-Wallis test with Bonferroni adjusted alpha-levels of 0.005 per test was used for variables that were not normally distributed. P-values are shown for the median. Groups were compared using the Mann-Whitney U test with Bonferroni adjusted alpha-levels of 0.0017 per test. Means and standard deviations are also reported for comparison purposes. The effect size *r* was obtained by computing partial eta-squared on the ranked scores and taking the square root.

<sup>c</sup> A univariate Between-Subjects ANOVA with Bonferroni adjusted alpha-levels of 0.005 were used for variables that were normally distributed. P-values are shown for the mean. Post-hoc comparisons were conducted using Bonferroni corrections. Median and interquartile range are also reported for comparison purposes.

<sup>d</sup> Percentile ranks are shown.

<sup>e</sup> Pairwise comparisons showed that PD-N=PD-MCI; PD-MCI>PD-D; PD-N>PD-D.

<sup>f</sup> Pairwise comparisons showed that PD-N>PD-MCI; PD-MCI=PD-D; PD-N>PD-D.
